# Supplementary material for: Interaction of WDR60 intermediate chain with TCTEX1D2 light chain of the dynein-2 complex is crucial for ciliary protein trafficking
Source: PubMed Central journal article supplement — Mol Biol Cell. 2018 Jul 1;29(13):1628–39. doi: 10.1091/mbc.E18-03-0173 (PMC6080652; doi:10.1091/mbc.e18-03-0173), 2018-07-01
Supplement: mbc-29-1628-s001.pdf [file mbc-29-1628-s001.pdf]

# Supplemental Materials

*Molecular Biology of the Cell*

Hamada et al.

## **Supplemental materials**

### **Interaction of WDR60 intermediate chain with TCTEX1D2 light chain of the dynein-2 complex is crucial for ciliary protein trafficking**

**Yuki Hamada, Yuta Tsurumi, Shohei Nozaki, Yohei Katoh, and Kazuhisa Nakayama**

Graduate School of Pharmaceutical Sciences, Kyoto University, Sakyo-ku, Kyoto 606-8501, Japan

**Video S1. TIRF microscopy of RPE1 cells expressing EGFP-DYNC2LI1**

Scale bar: 5  $\mu$ m

**Video S2. TIRF microscopy of the #1D2-2-9 cells expressing EGFP-DYNC2LI1**

Scale bar: 5  $\mu$ m

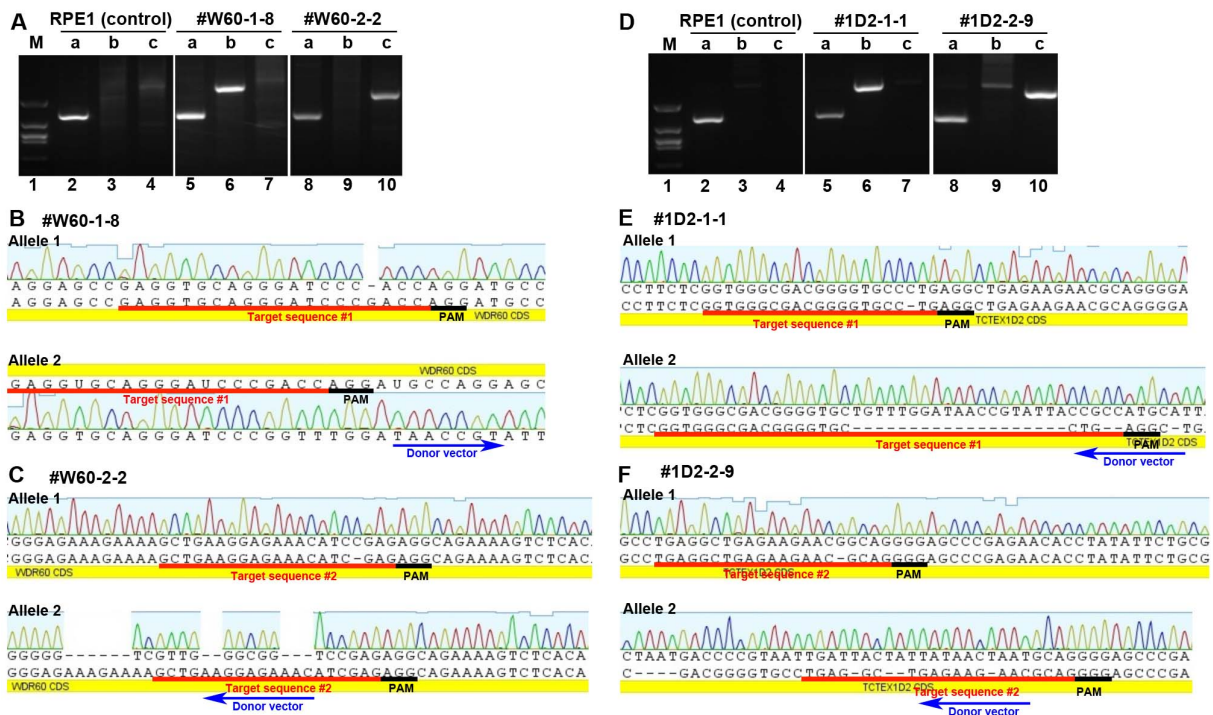

**Fig. S1. Genomic PCR and sequencing to confirm donor vector integration or small deletions or insertions in selected *WDR60*-KO and *TCTEX1D2*-KO cell lines**

(A) Genomic DNA was extracted from control hTERT-RPE1 cells (lanes 2–4), and from *WDR60*-KO cell lines (#W60-1-8, lanes 5–7; and #W60-2-2, lanes 8–10) established using the all-in-one vector containing a target sequence (see Table S3) and the donor knock-in vector. The DNA was subjected to PCR using primer pair a (primers 1 + 2; lanes 2, 5, and 8), pair b (primers 1 + 3; lanes 3, 6, and 9), or pair c (primers 2 + 3; lanes 4, 7, and 10) (see Table S3) to detect alleles with a small indel, or with a forward or reverse integration of the donor vector, respectively. Lane 1, fragments of the *DdeI*-digested pSP64 plasmid. (B) and (C), alignments of allele sequences of cell lines #W60-1-8 and #W60-2-2 determined by direct sequencing of the genomic PCR products with the reference sequence. Red and black lines indicate the target sequences and PAM sequence, respectively. Blue arrows indicate the direction of donor vector integration. (D) Genomic DNA was extracted from control hTERT-RPE1 cells (lanes 2–4), and from *TCTEX1D2*-KO cell lines (#1D2-1-1, lanes 5–7; and #1D2-2-9, lanes 8–10) established using the all-in-one vector containing a target sequence (see Table S3) and the donor knock-in vector. The DNA was subjected to PCR in a similar manner to that described in (A). (E) and (F), alignments of allele sequences of cell lines #1D2-1-1 and #1D2-2-9 determined by direct sequencing of the genomic PCR products with the reference sequence.

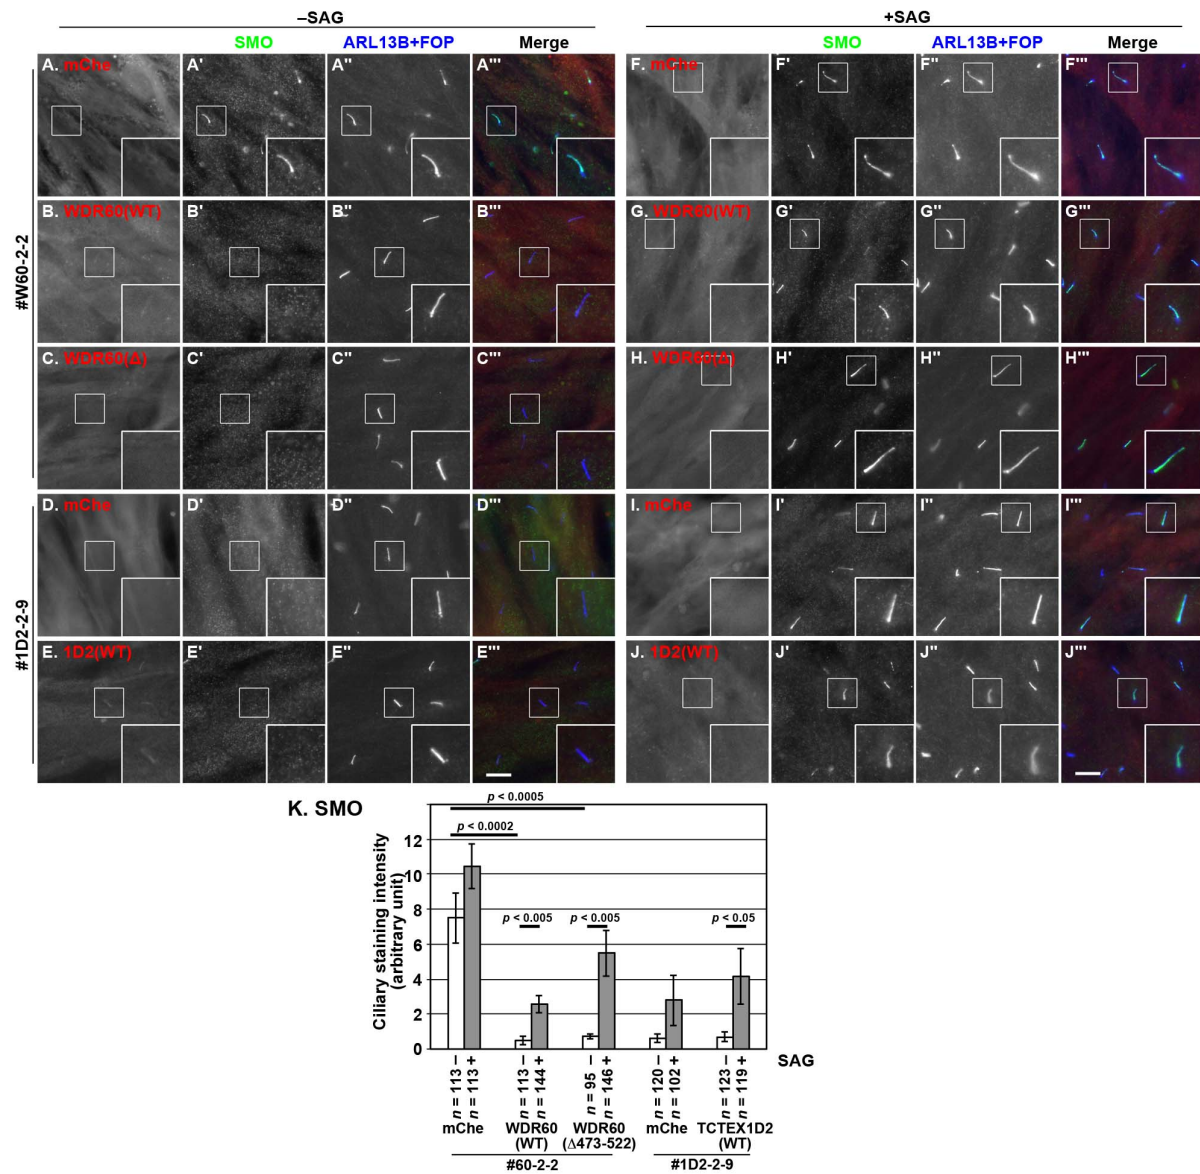

**Fig. S2. Rescue of SMO localization in *WDR60*-KO and *TCTEX1D2*-KO cells upon the respective expression of a *WDR60* or *TCTEX1D2* construct**

The #W60-2-2 cell line stably expressing mCherry (A, F), mCherry-fused *WDR60*(WT) (B, G), or *WDR60*( $\Delta$ 473–522) (C, H), or the #1D2-2-9 cell line stably expressing mCherry (D, I) or mCherry-*TCTEX1D2*(WT) (E, J) were cultured and treated with SAG as described in the legend for Fig. 4, and quadruple immunostained for either RFP (A–J), SMO (A'–J'), and ARL13B+FOP (A''–J''). (K) Relative staining intensities for SMO were estimated and expressed as described in the legend for Fig. 4. Values are means  $\pm$  S.D. of three independent experiments. In each set of experiments, 31–50 ciliated cells were analyzed, and the total numbers of ciliated cells analyzed (*n*) are shown. *p*, one-way ANOVA followed by Tukey post-hoc analysis for comparison among the cell lines, and the Student *t*-test for comparison between the cells with and without SAG treatment.

**Table S1. Sources of cDNAs used in this study**

| cDNA     | Ref. sequence | CDS<br>(bp) | Protein<br>(a.a.) | Species | Source                                       |
|----------|---------------|-------------|-------------------|---------|----------------------------------------------|
| DYNC2H1  | NM_001377     | 12,924      | 4,307             | Human   | Kazusa DNA Res. Inst. clone ID: bj00195y2    |
| DYNC2LI1 | NM_001193464  | 1,059       | 352               | Human   | Riken BRC clone ID: IRAL016M21               |
| WDR34    | NM_052844     | 1,611       | 536               | Human   | Riken BRC clone ID: IRAL028A16               |
| WDR60    | NM_018051     | 3,201       | 1,066             | Human   | Riken BRC clone ID: IRAL034P23               |
| DYNLL1   | NM_001037494  | 270         | 89                | Human   | Synthesized by Geneart (Regensburg, Germany) |
| DYNLL2   | NM_080677     | 270         | 89                | Human   | Synthesized by Geneart (Regensburg, Germany) |
| DYNLRB1  | NM_014183     | 291         | 96                | Human   | Synthesized by Geneart (Regensburg, Germany) |
| DYNLRB2  | NM_130897     | 291         | 96                | Human   | Synthesized by Geneart (Regensburg, Germany) |
| DYNLT1   | NM_006519     | 342         | 113               | Human   | Synthesized by Geneart (Regensburg, Germany) |
| DYNLT3   | NM_006520     | 351         | 116               | Human   | Synthesized by Geneart (Regensburg, Germany) |
| TCTEX1D2 | NM_152773     | 429         | 142               | Human   | Synthesized by Geneart (Regensburg, Germany) |

**Table S2. Plasmids used in this study**

| Vector                          | Insert                 | Reference           |
|---------------------------------|------------------------|---------------------|
| pCAG2-EGFP-N                    | DYNC2H1(tail; 1–1,650) | This study          |
| pCAG2-EGFP-C                    | DYNC2LI1               | This study          |
| pCAG2-EGFP-C                    | WDR34                  | This study          |
| pCAG2-EGFP-C                    | WDR60                  | This study          |
| pCAG2-EGFP-C                    | DYNLL1                 | This study          |
| pCAG2-EGFP-C                    | DYNLL2                 | This study          |
| pCAG2-EGFP-C                    | DYNLRB1                | This study          |
| pCAG2-EGFP-C                    | DYNLRB2                | This study          |
| pCAG2-EGFP-C                    | DYNLT1                 | This study          |
| pCAG2-EGFP-C                    | DYNLT3                 | This study          |
| pCAG2-EGFP-C                    | TCTEX1D2               | This study          |
| pCAG2-mCherry-N                 | DYNC2H1(tail; 1–1,650) | This study          |
| pCAG2-mCherry-C                 | DYNC2LI1               | This study          |
| pCAG2-mCherry-C                 | WDR34                  | This study          |
| pCAG2-mCherry-C                 | WDR60                  | This study          |
| pCAG2-mCherry-C                 | DYNLL1                 | This study          |
| pmCherry-C1                     | DYNLL2                 | This study          |
| pCAG2-mCherry-C                 | DYNLRB1                | This study          |
| pCAG2-mCherry-C                 | DYNLRB2                | This study          |
| pCAG2-mCherry-C                 | DYNLT1                 | This study          |
| pCAG2-mCherry-C                 | DYNLT3                 | This study          |
| pCAG2-mCherry-C                 | TCTEX1D2               | This study          |
| pCAG2-EGFP-C                    | WDR60(375–1066)        | This study          |
| pCAG2-EGFP-C                    | WDR60(473–1,066)       | This study          |
| pCAG2-EGFP-C                    | WDR60(523–1066)        | This study          |
| pCAG2-EGFP-C                    | WDR60(Δ 473–522)       | This study          |
| pRRL.sinPPT-mCherry-C           | WDR60                  | This study          |
| pRRL.sinPPT-mCherry-C           | WDR60(Δ 473–522)       | This study          |
| pRRL.sinPPT-mCherry-C           | TCTEX1D2               | This study          |
| pRRL.sinPPT-EGFP-C              | DYNC2LI1               | This study          |
| pDonor-tBFP-NLS-Neo (Universal) | –                      | Katoh et al. (2017) |
| peSpCas9 (1.1)-2×gRNA           | –                      | Katoh et al. (2017) |
| pGEX-6P1                        | GFP-nanobody           | Katoh et al. (2015) |

**Table S3: Antibodies used in this study**

| Antibody                        | Manufacturer           | Clone or catalog number                   | Dilution (purpose) |
|---------------------------------|------------------------|-------------------------------------------|--------------------|
| Polyclonal rabbit anti-IFT88    | Proteintech            | 13967-1-AP                                | 1:500 (IF)         |
| Polyclonal rabbit anti-GPR161   | Proteintech            | 13398-1-AP                                | 1:200 (IF)         |
| Polyclonal rabbit anti-IFT140   | Proteintech            | 17460-1-AP                                | 1:100 (IF)         |
| Polyclonal rabbit anti-SMO      | Abcam                  | ab38686                                   | 1:100 (IF)         |
| Monoclonal rabbit anti-ARL13B   | Abcam                  | N29566                                    | 1:500 (IF)         |
| Monoclonal mouse anti-FOP       | Abnova                 | 2B1                                       | 1:10,000 (IF)      |
| Monoclonal mouse anti-GFP       | BD Biosciences         | JL-8                                      | 1:1,000 (IB)       |
| Monoclonal mouse anti-RFP       | MBL                    | 3G5                                       | 1:5,000 (IF)       |
| Polyclonal rabbit anti-RFP      | MBL                    | PM005                                     | 1:1,000 (IB)       |
| AlexaFluor-conjugated secondary | Molecular Probes       | A11034, A21127, A21137,<br>A21241, A21242 | 1:1,000 (IF)       |
| Peroxidase-conjugated secondary | Jackson ImmunoResearch | 115-035-166, 111-035-144                  | 1:3,000 (IB)       |

IF, immunofluorescence; IB, immunoblotting

**Table S4: Oligo DNAs used in this study**

| Name                          | Sequence                        |
|-------------------------------|---------------------------------|
| pTagBFP-N-RV2 (primer 3)      | 5'-CGTAGAGGAAGCTAGTAGCCAGG-3'   |
| WDR60-genome-FW (primer 1)    | 5'-GAAACTGGGATTGGAAAGCAG-3'     |
| WDR60-genome-RV (primer 2)    | 5'-GCAGCGAGCTATCAACCTGTC-3'     |
| WDR60-exon 3-gRNA#1-S         | 5'-CACCGAGGTGCAGGGATCCCGACC-3'  |
| WDR60-exon 3-gRNA#1-AS        | 5'-AAACGGTCGGGATCCCTGCACCTC-3'  |
| WDR60-exon 3-gRNA#2-S         | 5'-CACCGCTGAAGGAGAAACATCGAG-3'  |
| WDR60-exon 3-gRNA#2-AS        | 5'-AAACCTCGATGTTTCTCCTTCAGC-3'  |
| TCTEX1D2-genome-FW (primer 1) | 5'-CCTCAAGTCCAGGAGCCTCAG-3'     |
| TCTEX1D2-genome-RV (primer 2) | 5'-CGCCCAAACACTGAGGAAG-3'       |
| TCTEX1D2-exon 1-gRNA#1-S      | 5'-CACCGGTGGGCGACGGGGTGCCCTG-3' |
| TCTEX1D2-exon 1-gRNA#1-AS     | 5'-AAACCAGGCACCCGTCGCCACCC-3'   |
| TCTEX1D2-exon 1-gRNA#2-S      | 5'-CACCGTGAGGCTGAGAAGAACGCAG-3' |
| TCTEX1D2-exon 1-gRNA#2-AS     | 5'-AAACCTGCGTTCTTCTCAGCCTCAC-3' |
